# Supplementary material for: Transcription Factor Hematopoietically Expressed Homeobox Protein (Hhex) Negatively Regulates Osteoclast Differentiation by Controlling Cyclin‐Dependent Kinase Inhibitors
Source: PubMed Central journal article supplement (PMC9009129; doi:10.1002/jbm4.10608), 2022-02-14

# Figure S3

A

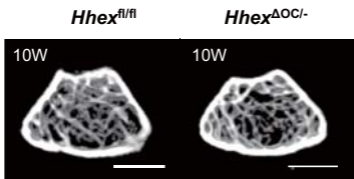

B

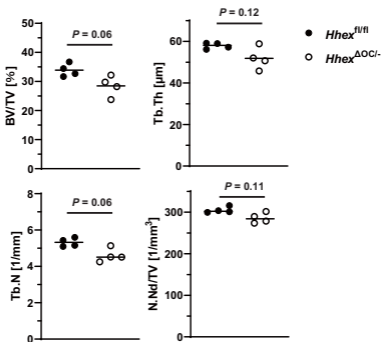

C

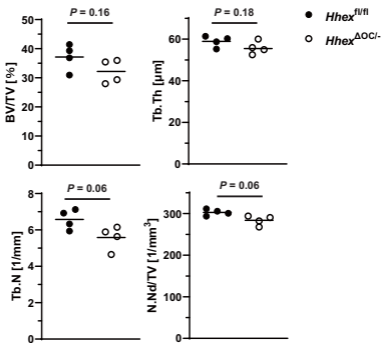

Supplement: JBM4-6-e10608-s004.pdf [file JBM4-6-e10608-s004.pdf]
